# Supplementary material
Source: Springer Nature journal article supplement (https://www.springermedizin.de/resource/supplementary/12985_2014_2417_MOESM5_ESM.pdf/9607054)

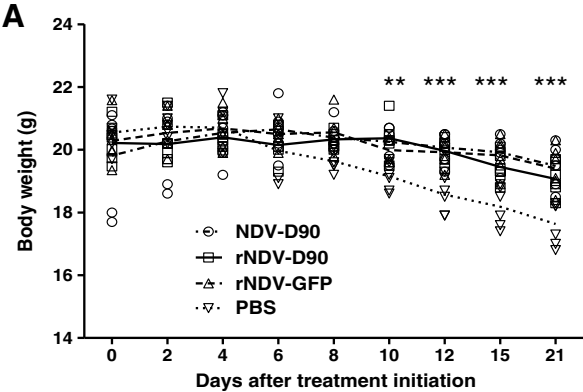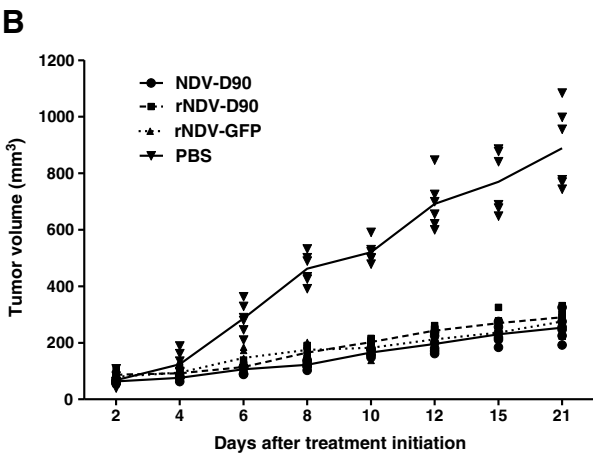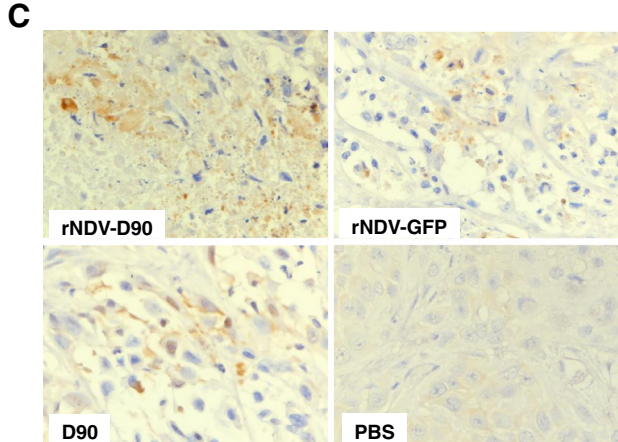

Supplement: MOESM5 [file 9607054]
